# Supplementary material
Source: PubMed Central journal article supplement (PMC4135764)
Supplement: AEM.00998-14_zam999105567so1.pdf [file AEM.00998-14_zam999105567so1.pdf]

**Supplemental Figure 1.** Hierarchical clustered heat map of the 50 most significant normalized LC-MS/MS protein detection numbers in the supernatant fraction as analyzed by ANOVA. ANOVAs performed to determine differences between growth substrates.

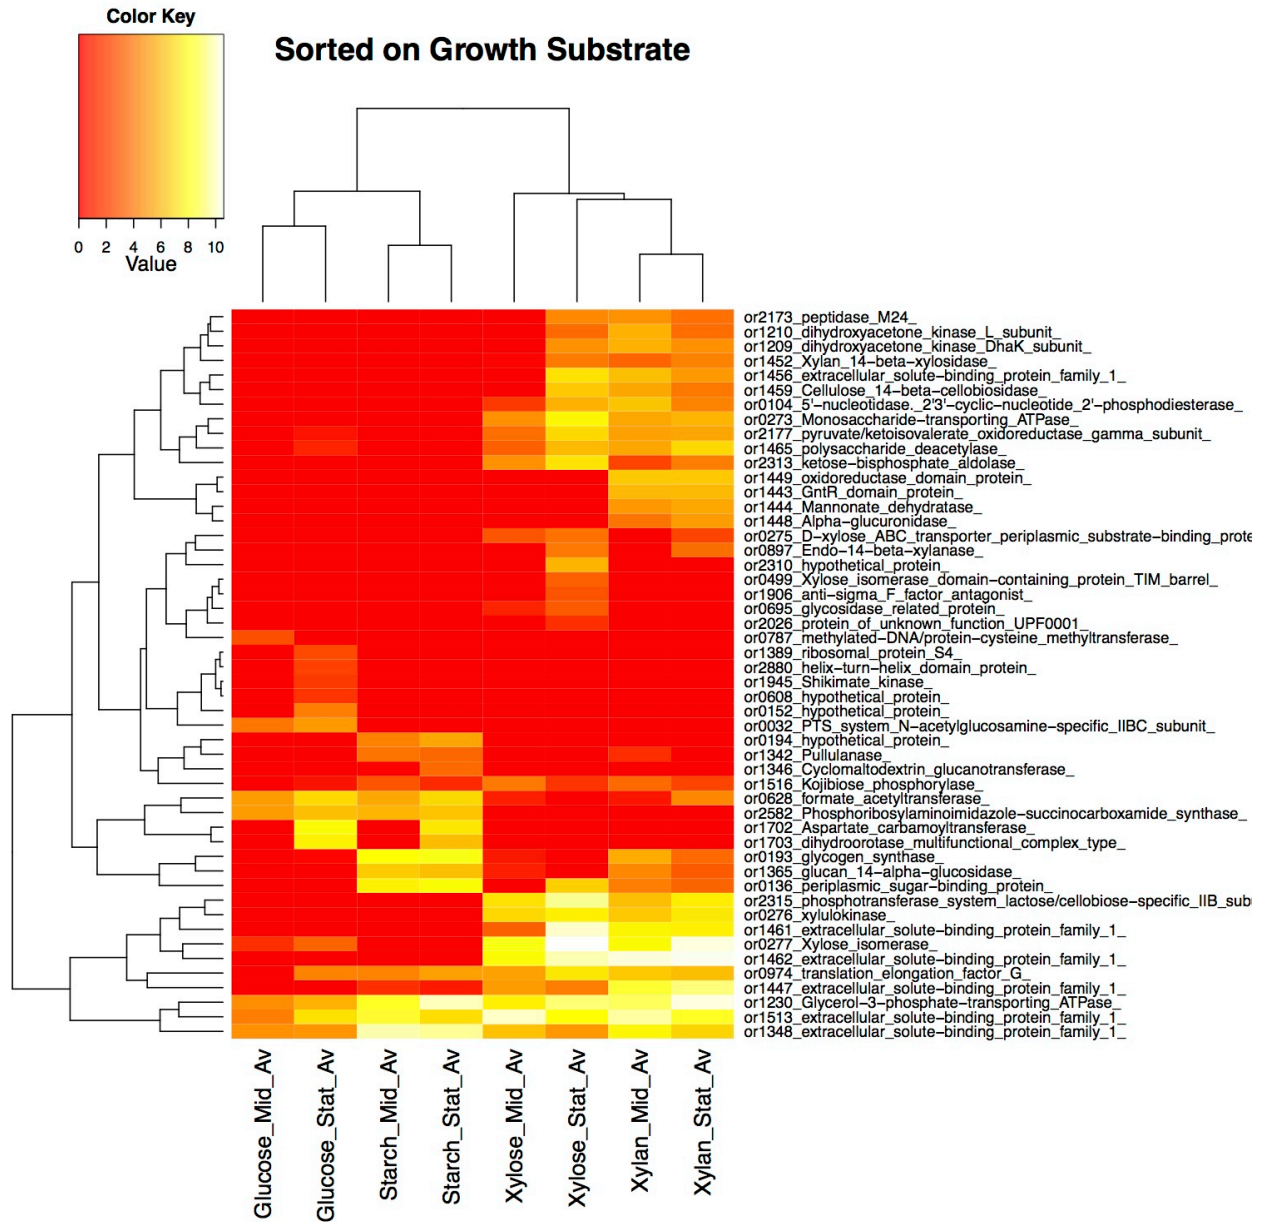

**Supplemental Table S1.** Proteins predicted to be secreted via the Sec pathway, excluding those with additional transmembrane domains. TM refers to transmembrane domains. Green highlight represents those proteins predicted to be active on carbohydrates.

| GeneID           | Product                                                           | TM Domains | Sec Tag  |
|------------------|-------------------------------------------------------------------|------------|----------|
| Tsac_0008        | Spore germination protein-like Gmad2                              | 0          | Y        |
| Tsac_0042        | basic membrane lipoprotein                                        | 0          | Y        |
| Tsac_0050        | FMN-binding domain protein                                        | 0          | Y        |
| Tsac_0087        | ABC-type metal ion transporter, periplasmic subunit               | 0          | Y        |
| Tsac_0091        | hypothetical protein                                              | 0          | Y        |
| Tsac_0115        | phosphotransferase system lactose/cellobiose-specific IIB subunit | 0          | Y        |
| Tsac_0167        | extracellular solute-binding protein family 1                     | 0          | Y        |
| Tsac_0203        | extracellular solute-binding protein family 1                     | 0          | Y        |
| Tsac_0312        | protein of unknown function DUF1779                               | 0          | Y        |
| Tsac_0426        | hypothetical protein                                              | 0          | Y        |
| Tsac_0561        | FMN-binding domain protein                                        | 0          | Y        |
| <b>Tsac_0691</b> | <b>glycoside hydrolase family 26</b>                              | <b>0</b>   | <b>Y</b> |
| Tsac_0692        | extracellular solute-binding protein family 1                     | 0          | Y        |
| Tsac_0716        | hypothetical protein                                              | 0          | Y        |
| Tsac_0796        | hypothetical protein                                              | 0          | Y        |
| Tsac_0822        | SpoIID/LytB domain protein                                        | 0          | Y        |
| Tsac_0832        | copper amine oxidase-like domain-containing protein               | 0          | Y        |
| Tsac_0881        | parvulin-like peptidyl-prolyl isomerase                           | 0          | Y        |
| Tsac_0886        | hypothetical protein                                              | 0          | Y        |
| Tsac_0898        | Sulphatase-modifying factor protein                               | 0          | Y        |
| Tsac_0913        | secretion protein HlyD family protein                             | 0          | Y        |
| Tsac_1154        | hypothetical protein                                              | 0          | Y        |
| Tsac_1165        | extracellular solute-binding protein family 1                     | 0          | Y        |
| <b>Tsac_1166</b> | <b>glycoside hydrolase family 26</b>                              | <b>0</b>   | <b>Y</b> |
| <b>Tsac_1191</b> | <b>delta-lactam-biosynthetic de-N-acetylase</b>                   | <b>0</b>   | <b>Y</b> |
| Tsac_1239        | Peptidase M23                                                     | 0          | Y        |
| Tsac_1251        | ABC-type transporter, periplasmic subunit family 3                | 0          | Y        |
| Tsac_1273        | hypothetical protein                                              | 0          | Y        |
| Tsac_1303        | ApbE family lipoprotein                                           | 0          | Y        |
| Tsac_1308        | NLP/P60 protein                                                   | 0          | Y        |
| <b>Tsac_1365</b> | <b>glucan 1,4-alpha-glucosidase</b>                               | <b>0</b>   | <b>Y</b> |
| Tsac_1461        | extracellular solute-binding protein family 1                     | 0          | Y        |
| Tsac_1462        | extracellular solute-binding protein family 1                     | 0          | Y        |
| Tsac_1466        | copper amine oxidase-like domain-containing protein               | 0          | Y        |
| Tsac_1504        | hypothetical protein                                              | 0          | Y        |
| Tsac_1513        | extracellular solute-binding protein family 1                     | 0          | Y        |
| Tsac_1583        | phosphate binding protein                                         | 0          | Y        |
| <b>Tsac_1624</b> | <b>cell wall hydrolase SleB</b>                                   | <b>0</b>   | <b>Y</b> |
| Tsac_1892        | peptidase S11 D-alanyl-D-alanine carboxypeptidase 1               | 0          | Y        |
| Tsac_2088        | extracellular solute-binding protein family 1                     | 0          | Y        |
| Tsac_2096        | hypothetical protein                                              | 0          | Y        |
| Tsac_2258        | extracellular solute-binding protein family 1                     | 0          | Y        |
| Tsac_2325        | extracellular solute-binding protein family 1                     | 0          | Y        |

|           |                                                     |   |   |
|-----------|-----------------------------------------------------|---|---|
| Tsac_2369 | hypothetical protein                                | 0 | Y |
| Tsac_2374 | Peptidase M23                                       | 0 | Y |
| Tsac_2514 | hypothetical protein                                | 0 | Y |
| Tsac_2515 | hypothetical protein                                | 0 | Y |
| Tsac_2516 | hypothetical protein                                | 0 | Y |
| Tsac_2571 | lipoprotein, YaeC family                            | 0 | Y |
| Tsac_2601 | ABC transporter substrate binding protein           | 0 | Y |
| Tsac_2602 | Extracellular ligand-binding receptor               | 0 | Y |
| Tsac_0005 | hypothetical protein                                | 1 | Y |
| Tsac_0006 | hypothetical protein                                | 1 | Y |
| Tsac_0017 | hypothetical protein                                | 1 | Y |
| Tsac_0049 | hypothetical protein                                | 1 | Y |
| Tsac_0068 | ABC-type transporter, periplasmic subunit           | 1 | Y |
| Tsac_0095 | hypothetical protein                                | 1 | Y |
| Tsac_0104 | 5'-Nucleotidase domain-containing protein           | 1 | Y |
| Tsac_0136 | periplasmic sugar-binding protein                   | 1 | Y |
| Tsac_0146 | Ig domain protein                                   | 1 | Y |
| Tsac_0147 | glycosyl hydrolase 53 domain protein                | 1 | Y |
| Tsac_0151 | extracellular solute-binding protein family 1       | 1 | Y |
| Tsac_0301 | S-layer domain-containing protein                   | 1 | Y |
| Tsac_0302 | S-layer domain-containing protein                   | 1 | Y |
| Tsac_0303 | Fibronectin type III domain protein                 | 1 | Y |
| Tsac_0330 | cell wall hydrolase/autolysin                       | 1 | Y |
| Tsac_0334 | efflux transporter, RND family, MFP subunit         | 1 | Y |
| Tsac_0342 | extracellular solute-binding protein family 1       | 1 | Y |
| Tsac_0344 | S-layer domain-containing protein                   | 1 | Y |
| Tsac_0361 | S-layer domain-containing protein                   | 1 | Y |
| Tsac_0362 | hypothetical protein                                | 1 | Y |
| Tsac_0373 | carboxyl-terminal protease                          | 1 | Y |
| Tsac_0378 | hypothetical protein                                | 1 | Y |
| Tsac_0441 | hypothetical protein                                | 1 | Y |
| Tsac_0450 | metallophosphoesterase                              | 1 | Y |
| Tsac_0497 | extracellular solute-binding protein family 1       | 1 | Y |
| Tsac_0579 | cell envelope-related transcriptional attenuator    | 1 | Y |
| Tsac_0655 | hypothetical protein                                | 1 | Y |
| Tsac_0715 | copper amine oxidase-like domain-containing protein | 1 | Y |
| Tsac_0718 | hypothetical protein                                | 1 | Y |
| Tsac_0723 | hypothetical protein                                | 1 | Y |
| Tsac_0760 | extracellular solute-binding protein family 1       | 1 | Y |
| Tsac_0798 | hypothetical protein                                | 1 | Y |
| Tsac_0799 | hypothetical protein                                | 1 | Y |
| Tsac_0800 | hypothetical protein                                | 1 | Y |
| Tsac_0827 | Septum formation initiator                          | 1 | Y |
| Tsac_0878 | S-layer domain-containing protein                   | 1 | Y |
| Tsac_0894 | hypothetical protein                                | 1 | Y |
| Tsac_0897 | glycoside hydrolase family 11                       | 1 | Y |
| Tsac_1143 | hypothetical protein                                | 1 | Y |
| Tsac_1157 | extracellular solute-binding protein family 1       | 1 | Y |
| Tsac_1279 | EppA_BapA family protein                            | 1 | Y |
| Tsac_1324 | hypothetical protein                                | 1 | Y |
| Tsac_1342 | alpha amylase catalytic region                      | 1 | Y |
| Tsac_1343 | extracellular solute-binding protein family 1       | 1 | Y |
| Tsac_1346 | alpha amylase catalytic region                      | 1 | Y |
| Tsac_1348 | extracellular solute-binding protein family 1       | 1 | Y |
| Tsac_1409 | flavodoxin                                          | 1 | Y |
| Tsac_1427 | Propeptide PepSY amd peptidase M4                   | 1 | Y |
| Tsac_1447 | extracellular solute-binding protein family 1       | 1 | Y |

|           |                                                        |   |   |
|-----------|--------------------------------------------------------|---|---|
| Tsac_1456 | extracellular solute-binding protein family 1          | 1 | Y |
| Tsac_1459 | glycoside hydrolase family 10                          | 1 | Y |
| Tsac_1509 | extracellular solute-binding protein family 1          | 1 | Y |
| Tsac_1525 | hypothetical protein                                   | 1 | Y |
| Tsac_1536 | glycoside hydrolase family 18                          | 1 | Y |
| Tsac_1557 | sporulation lipoprotein, YhcN/YlaJ family              | 1 | Y |
| Tsac_1572 | protein of unknown function DUF881                     | 1 | Y |
| Tsac_1644 | ABC-type transporter, periplasmic subunit              | 1 | Y |
| Tsac_1684 | SpoIID/LytB domain protein                             | 1 | Y |
| Tsac_1907 | peptidase S11 D-alanyl-D-alanine carboxypeptidase 1    | 1 | Y |
| Tsac_1931 | stage III sporulation protein AH                       | 1 | Y |
| Tsac_2035 | hypothetical protein                                   | 1 | Y |
| Tsac_2066 | cell wall hydrolase/autolysin                          | 1 | Y |
| Tsac_2139 | NLP/P60 protein                                        | 1 | Y |
| Tsac_2143 | Lytic transglycosylase catalytic                       | 1 | Y |
| Tsac_2153 | Propeptide PepSY and peptidase M4                      | 1 | Y |
| Tsac_2187 | Sporulation uncharacterized protein YkwD               | 1 | Y |
| Tsac_2231 | Extracellular ligand-binding receptor                  | 1 | Y |
| Tsac_2243 | ABC transporter, periplasmic molybdate-binding protein | 1 | Y |
| Tsac_2296 | extracellular solute-binding protein family 1          | 1 | Y |
| Tsac_2304 | extracellular solute-binding protein family 1          | 1 | Y |
| Tsac_2356 | hypothetical protein                                   | 1 | Y |
| Tsac_2372 | efflux transporter, RND family, MFP subunit            | 1 | Y |
| Tsac_2378 | Peptidoglycan-binding domain 1 protein                 | 1 | Y |
| Tsac_2389 | copper amine oxidase-like domain-containing protein    | 1 | Y |
| Tsac_2460 | hypothetical protein                                   | 1 | Y |
| Tsac_2467 | glycoside hydrolase family 18                          | 1 | Y |
| Tsac_2468 | beta-lactamase                                         | 1 | Y |
| Tsac_2552 | cell wall hydrolase/autolysin                          | 1 | Y |
| Tsac_2557 | ABC-type transporter, periplasmic subunit              | 1 | Y |
| Tsac_2655 | ABC-type transporter, periplasmic subunit family 3     | 1 | Y |

**Supplemental Table S2.** Those proteins that containing transmembrane domains and are not freely secreted. A number of these proteins have predicted secretory tags, however, these also have more than 1 transmembrane domain suggesting that they are ultimately membrane localized.

| GeneID    | Product                                                    | TM Domains | Sec Tag |
|-----------|------------------------------------------------------------|------------|---------|
| Tsac_0013 | hypothetical protein                                       | 1          | N       |
| Tsac_0016 | hypothetical protein                                       | 1          | N       |
| Tsac_0025 | Capsule synthesis protein, CapA                            | 1          | N       |
| Tsac_0043 | Formiminotransferase-cyclodeaminase                        | 1          | N       |
| Tsac_0072 | hypothetical protein                                       | 1          | N       |
| Tsac_0075 | hypothetical protein                                       | 1          | N       |
| Tsac_0082 | hypothetical protein                                       | 1          | N       |
| Tsac_0099 | hypothetical protein                                       | 1          | N       |
| Tsac_0123 | hypothetical protein                                       | 1          | N       |
| Tsac_0126 | penicillin-binding protein, 1A family                      | 1          | N       |
| Tsac_0137 | periplasmic binding protein/LacI transcriptional regulator | 1          | N       |
| Tsac_0140 | LacI family transcriptional regulator                      | 1          | N       |
| Tsac_0142 | hypothetical protein                                       | 1          | N       |
| Tsac_0179 | L-lactate dehydrogenase                                    | 1          | N       |
| Tsac_0183 | hypothetical protein                                       | 1          | N       |
| Tsac_0190 | protein of unknown function DUF881                         | 1          | N       |
| Tsac_0191 | cellulose biosynthesis protein                             | 1          | N       |
| Tsac_0197 | flavin reductase domain protein FMN-binding protein        | 1          | N       |
| Tsac_0198 | band 7 protein                                             | 1          | N       |
| Tsac_0230 | 67 kDa myosin-cross-reactive antigen family protein        | 1          | N       |
| Tsac_0231 | transcriptional regulator, TetR family                     | 1          | N       |
| Tsac_0258 | hypothetical protein                                       | 1          | N       |
| Tsac_0283 | hypothetical protein                                       | 1          | N       |
| Tsac_0284 | hypothetical protein                                       | 1          | N       |
| Tsac_0290 | hypothetical protein                                       | 1          | N       |
| Tsac_0299 | Peptidase M23                                              | 1          | N       |
| Tsac_0300 | stage II sporulation protein D                             | 1          | N       |
| Tsac_0305 | hypothetical protein                                       | 1          | N       |
| Tsac_0331 | thiamine biosynthesis Thi4 protein                         | 1          | N       |
| Tsac_0338 | glycoside hydrolase family 5                               | 1          | N       |
| Tsac_0363 | polysaccharide deacetylase                                 | 1          | N       |
| Tsac_0389 | copper amine oxidase-like domain-containing protein        | 1          | N       |
| Tsac_0408 | hypothetical protein                                       | 1          | N       |
| Tsac_0417 | hypothetical protein                                       | 1          | N       |
| Tsac_0419 | aldo/keto reductase                                        | 1          | N       |
| Tsac_0424 | hypothetical protein                                       | 1          | N       |
| Tsac_0425 | hypothetical protein                                       | 1          | N       |
| Tsac_0437 | peptidase S1 and S6 chymotrypsin/Hap                       | 1          | N       |
| Tsac_0439 | Protein of unknown function YychH                          | 1          | N       |
| Tsac_0440 | YychH family protein                                       | 1          | N       |
| Tsac_0444 | hypothetical protein                                       | 1          | N       |
| Tsac_0445 | Peptidase M23                                              | 1          | N       |
| Tsac_0448 | Peptidase M1 membrane alanine aminopeptidase               | 1          | N       |
| Tsac_0469 | hypothetical protein                                       | 1          | N       |
| Tsac_0481 | hypothetical protein                                       | 1          | N       |
| Tsac_0482 | hypothetical protein                                       | 1          | N       |
| Tsac_0490 | hypothetical protein                                       | 1          | N       |
| Tsac_0493 | FAD dependent oxidoreductase                               | 1          | N       |
| Tsac_0503 | peptidase S1 and S6 chymotrypsin/Hap                       | 1          | N       |

|           |                                               |   |   |
|-----------|-----------------------------------------------|---|---|
| Tsac_0508 | hypothetical protein                          | 1 | N |
| Tsac_0525 | putative phosphoesterase                      | 1 | N |
| Tsac_0538 | hypothetical protein                          | 1 | N |
| Tsac_0577 | signal peptidase I                            | 1 | N |
| Tsac_0593 | glycosyl transferase family 2                 | 1 | N |
| Tsac_0659 | hypothetical protein                          | 1 | N |
| Tsac_0662 | transposase IS4 family protein                | 1 | N |
| Tsac_0666 | G5 domain protein                             | 1 | N |
| Tsac_0672 | hypothetical protein                          | 1 | N |
| Tsac_0673 | AAA ATPase central domain protein             | 1 | N |
| Tsac_0708 | hypothetical protein                          | 1 | N |
| Tsac_0710 | hypothetical protein                          | 1 | N |
| Tsac_0711 | hypothetical protein                          | 1 | N |
| Tsac_0732 | UDP-N-acetylmuramate--L-alanine ligase        | 1 | N |
| Tsac_0739 | peptidase S1 and S6 chymotrypsin/Hap          | 1 | N |
| Tsac_0757 | spore cortex-lytic enzyme                     | 1 | N |
| Tsac_0758 | germination protein YpeB                      | 1 | N |
| Tsac_0786 | hypothetical protein                          | 1 | N |
| Tsac_0793 | hypothetical protein                          | 1 | N |
| Tsac_0794 | hypothetical protein                          | 1 | N |
| Tsac_0868 | Peptidase M23                                 | 1 | N |
| Tsac_0879 | hypothetical protein                          | 1 | N |
| Tsac_0882 | SAF domain protein                            | 1 | N |
| Tsac_0888 | hypothetical protein                          | 1 | N |
| Tsac_0892 | hypothetical protein                          | 1 | N |
| Tsac_0893 | hypothetical protein                          | 1 | N |
| Tsac_0908 | phage holin, LL-H family                      | 1 | N |
| Tsac_0910 | hypothetical protein                          | 1 | N |
| Tsac_0929 | hypothetical protein                          | 1 | N |
| Tsac_0934 | serine/threonine protein kinase               | 1 | N |
| Tsac_0985 | PGAP1 family protein                          | 1 | N |
| Tsac_0991 | cysteinyl-tRNA synthetase                     | 1 | N |
| Tsac_0997 | preprotein translocase, SecE subunit          | 1 | N |
| Tsac_1056 | N-acetylmuramoyl-L-alanine amidase CwID       | 1 | N |
| Tsac_1062 | YbbR family protein                           | 1 | N |
| Tsac_1067 | Pyruvate/ketoisovalerate oxidoreductase       | 1 | N |
| Tsac_1068 | phospholipid/glycerol acyltransferase         | 1 | N |
| Tsac_1089 | peptidase U61 LD-carboxypeptidase A           | 1 | N |
| Tsac_1113 | hypothetical protein                          | 1 | N |
| Tsac_1129 | Peptidoglycan-binding domain 1 protein        | 1 | N |
| Tsac_1155 | oxidoreductase domain protein                 | 1 | N |
| Tsac_1162 | hypothetical protein                          | 1 | N |
| Tsac_1183 | LmbE family protein                           | 1 | N |
| Tsac_1189 | hypothetical protein                          | 1 | N |
| Tsac_1221 | hypothetical protein                          | 1 | N |
| Tsac_1240 | carboxyl-terminal protease                    | 1 | N |
| Tsac_1245 | FHA domain containing protein                 | 1 | N |
| Tsac_1247 | penicillin-binding protein transpeptidase     | 1 | N |
| Tsac_1293 | hypothetical protein                          | 1 | N |
| Tsac_1300 | extracellular solute-binding protein family 1 | 1 | N |
| Tsac_1302 | polysaccharide deacetylase                    | 1 | N |
| Tsac_1304 | protein of unknown function DUF1312           | 1 | N |
| Tsac_1305 | penicillin-binding protein transpeptidase     | 1 | N |
| Tsac_1311 | phenylacetic acid degradation-related protein | 1 | N |
| Tsac_1353 | XRE family transcriptional regulator          | 1 | N |
| Tsac_1421 | ATP synthase subunit b                        | 1 | N |
| Tsac_1432 | NMT1/THI5 like domain protein                 | 1 | N |

|           |                                                                              |   |   |
|-----------|------------------------------------------------------------------------------|---|---|
| Tsac_1518 | polysaccharide deacetylase                                                   | 1 | N |
| Tsac_1538 | Peptidase M23                                                                | 1 | N |
| Tsac_1543 | hypothetical protein                                                         | 1 | N |
| Tsac_1562 | cell division protein FtsL                                                   | 1 | N |
| Tsac_1563 | stage V sporulation protein D                                                | 1 | N |
| Tsac_1571 | Polypeptide-transport-associated domain protein FtsQ-type                    | 1 | N |
| Tsac_1591 | hypothetical protein                                                         | 1 | N |
| Tsac_1602 | hypothetical protein                                                         | 1 | N |
| Tsac_1627 | hypothetical protein                                                         | 1 | N |
| Tsac_1628 | hypothetical protein                                                         | 1 | N |
| Tsac_1633 | alkyl hydroperoxide reductase/ Thiol specific antioxidant/ Mal allergen      | 1 | N |
| Tsac_1637 | Protein of unknown function DUF2078, membrane                                | 1 | N |
| Tsac_1657 | UBA/THIF-type NAD/FAD binding protein                                        | 1 | N |
| Tsac_1668 | hypothetical protein                                                         | 1 | N |
| Tsac_1679 | hypothetical protein                                                         | 1 | N |
| Tsac_1687 | preprotein translocase, YajC subunit                                         | 1 | N |
| Tsac_1705 | Dihydroorotate dehydrogenase, electron transfer subunit                      | 1 | N |
| Tsac_1726 | serine/threonine protein kinase with PASTA sensor(s)                         | 1 | N |
| Tsac_1786 | hypothetical protein                                                         | 1 | N |
| Tsac_1791 | flagellar basal body-associated protein FlIL                                 | 1 | N |
| Tsac_1795 | hypothetical protein                                                         | 1 | N |
| Tsac_1835 | polysaccharide deacetylase                                                   | 1 | N |
| Tsac_1878 | hypothetical protein                                                         | 1 | N |
| Tsac_1903 | hypothetical protein                                                         | 1 | N |
| Tsac_1915 | hypothetical protein                                                         | 1 | N |
| Tsac_1916 | Thiamin pyrophosphokinase catalytic domain-containing protein                | 1 | N |
| Tsac_1918 | stage IV sporulation protein B                                               | 1 | N |
| Tsac_1932 | stage III sporulation protein AG                                             | 1 | N |
| Tsac_1946 | hypothetical protein                                                         | 1 | N |
| Tsac_1947 | Fimbrial assembly family protein                                             | 1 | N |
| Tsac_1950 | hypothetical protein                                                         | 1 | N |
| Tsac_1951 | hypothetical protein                                                         | 1 | N |
| Tsac_1953 | hypothetical protein                                                         | 1 | N |
| Tsac_1955 | Tfp pilus assembly protein PilE-like protein                                 | 1 | N |
| Tsac_1970 | penicillin-binding protein transpeptidase                                    | 1 | N |
| Tsac_1973 | aminodeoxychorismate lyase                                                   | 1 | N |
| Tsac_1982 | hypothetical protein                                                         | 1 | N |
| Tsac_1985 | hypothetical protein                                                         | 1 | N |
| Tsac_2004 | transketolase                                                                | 1 | N |
| Tsac_2006 | hypothetical protein                                                         | 1 | N |
| Tsac_2007 | hypothetical protein                                                         | 1 | N |
| Tsac_2027 | Uncharacterized conserved protein UCP02828, putative membrane fusion protein | 1 | N |
| Tsac_2037 | hypothetical protein                                                         | 1 | N |
| Tsac_2041 | ubiquitin-associated- domain-containing protein                              | 1 | N |
| Tsac_2049 | sporulation protein YqfD                                                     | 1 | N |
| Tsac_2063 | hypothetical protein                                                         | 1 | N |
| Tsac_2067 | stage II sporulation protein P                                               | 1 | N |
| Tsac_2097 | competence protein ComEA helix-hairpin-helix repeat protein                  | 1 | N |
| Tsac_2098 | peptidase S11 D-alanyl-D-alanine carboxypeptidase 1                          | 1 | N |
| Tsac_2113 | Peptidase M23                                                                | 1 | N |
| Tsac_2119 | penicillin-binding protein 2                                                 | 1 | N |
| Tsac_2121 | rod shape-determining protein MreC                                           | 1 | N |
| Tsac_2136 | Sporulation domain-containing protein                                        | 1 | N |
| Tsac_2148 | ErfK/YbiS/YcfS/YnhG family protein                                           | 1 | N |
| Tsac_2165 | hypothetical protein                                                         | 1 | N |
| Tsac_2177 | pyruvate/ketoisovalerate oxidoreductase, gamma subunit                       | 1 | N |

|           |                                                                        |   |   |
|-----------|------------------------------------------------------------------------|---|---|
| Tsac_2191 | sporulation protein YunB                                               | 1 | N |
| Tsac_2219 | permease for cytosine/purines uracil thiamine allantoin                | 1 | N |
| Tsac_2226 | molybdenum ABC transporter, periplasmic molybdate-binding protein      | 1 | N |
| Tsac_2253 | hypothetical protein                                                   | 1 | N |
| Tsac_2292 | fumarate reductase/succinate dehydrogenase flavoprotein domain protein | 1 | N |
| Tsac_2349 | peptidase S1 and S6 chymotrypsin/Hap                                   | 1 | N |
| Tsac_2375 | LmbE family protein                                                    | 1 | N |
| Tsac_2387 | Potassium-transporting ATPase C chain                                  | 1 | N |
| Tsac_2391 | penicillin-binding protein, 1A family                                  | 1 | N |
| Tsac_2395 | thiamine biosynthesis Thi4 protein                                     | 1 | N |
| Tsac_2409 | hypothetical protein                                                   | 1 | N |
| Tsac_2411 | phage-like protein                                                     | 1 | N |
| Tsac_2430 | hypothetical protein                                                   | 1 | N |
| Tsac_2464 | LemA family protein                                                    | 1 | N |
| Tsac_2492 | VanW family protein                                                    | 1 | N |
| Tsac_2513 | hypothetical protein                                                   | 1 | N |
| Tsac_2520 | hypothetical protein                                                   | 1 | N |
| Tsac_2525 | hypothetical protein                                                   | 1 | N |
| Tsac_2591 | hypothetical protein                                                   | 1 | N |
| Tsac_2592 | hypothetical protein                                                   | 1 | N |
| Tsac_2593 | hypothetical protein                                                   | 1 | N |
| Tsac_2594 | hypothetical protein                                                   | 1 | N |
| Tsac_2596 | hypothetical protein                                                   | 1 | N |
| Tsac_2607 | HutP family protein                                                    | 1 | N |
| Tsac_2611 | hypothetical protein                                                   | 1 | N |
| Tsac_2616 | OmpA/MotB domain protein                                               | 1 | N |
| Tsac_0009 | integral membrane sensor signal transduction histidine kinase          | 2 | N |
| Tsac_0015 | protein of unknown function DUF421                                     | 2 | N |
| Tsac_0034 | methyl-accepting chemotaxis sensory transducer                         | 2 | N |
| Tsac_0090 | hypothetical protein                                                   | 2 | N |
| Tsac_0093 | hypothetical protein                                                   | 2 | N |
| Tsac_0097 | hypothetical protein                                                   | 2 | N |
| Tsac_0101 | hypothetical protein                                                   | 2 | N |
| Tsac_0139 | integral membrane sensor signal transduction histidine kinase          | 2 | N |
| Tsac_0199 | protein of unknown function DUF107                                     | 2 | N |
| Tsac_0206 | putative signal transduction histidine kinase                          | 2 | N |
| Tsac_0238 | hypothetical protein                                                   | 2 | N |
| Tsac_0288 | methyl-accepting chemotaxis sensory transducer with Cache sensor       | 2 | N |
| Tsac_0345 | hypothetical protein                                                   | 2 | N |
| Tsac_0356 | glycosyl transferase family 2                                          | 2 | N |
| Tsac_0359 | integral membrane sensor signal transduction histidine kinase          | 2 | N |
| Tsac_0442 | integral membrane sensor signal transduction histidine kinase          | 2 | N |
| Tsac_0457 | hypothetical protein                                                   | 2 | N |
| Tsac_0485 | 2-keto-3-deoxygluconate permease                                       | 2 | N |
| Tsac_0487 | 2-keto-3-deoxygluconate permease                                       | 2 | N |
| Tsac_0516 | methyl-accepting chemotaxis sensory transducer                         | 2 | N |
| Tsac_0517 | XapX domain protein                                                    | 2 | N |
| Tsac_0612 | putative PAS/PAC sensor protein                                        | 2 | N |
| Tsac_0622 | hypothetical protein                                                   | 2 | N |
| Tsac_0751 | hypothetical protein                                                   | 2 | N |
| Tsac_0862 | TRAG family protein                                                    | 2 | N |
| Tsac_0863 | hypothetical protein                                                   | 2 | N |
| Tsac_0865 | hypothetical protein                                                   | 2 | N |
| Tsac_0875 | hypothetical protein                                                   | 2 | N |
| Tsac_0880 | hypothetical protein                                                   | 2 | N |
| Tsac_0937 | ATP-dependent metalloprotease FtsH                                     | 2 | N |



|           |                                                                           |   |   |
|-----------|---------------------------------------------------------------------------|---|---|
| Tsac_0951 | hypothetical protein                                                      | 2 | N |
| Tsac_1058 | protein of unknown function DUF58                                         | 2 | N |
| Tsac_1061 | Conserved hypothetical protein CHP00159                                   | 2 | N |
| Tsac_1085 | hypothetical protein                                                      | 2 | N |
| Tsac_1100 | hypothetical protein                                                      | 2 | N |
| Tsac_1110 | hypothetical protein                                                      | 2 | N |
| Tsac_1160 | NHL repeat containing protein                                             | 2 | N |
| Tsac_1218 | ATP-dependent metalloprotease FtsH                                        | 2 | N |
| Tsac_1222 | ABC-type uncharacterized transport system                                 | 2 | N |
| Tsac_1289 | ATPase, P-type (transporting), HAD superfamily, subfamily IC              | 2 | N |
| Tsac_1327 | hypothetical protein                                                      | 2 | N |
| Tsac_1328 | hypothetical protein                                                      | 2 | N |
| Tsac_1329 | hypothetical protein                                                      | 2 | N |
| Tsac_1347 | methyl-accepting chemotaxis sensory transducer with Cache sensor          | 2 | N |
| Tsac_1378 | integral membrane sensor signal transduction histidine kinase             | 2 | N |
| Tsac_1420 | ATP synthase subunit c                                                    | 2 | N |
| Tsac_1455 | integral membrane sensor signal transduction histidine kinase             | 2 | N |
| Tsac_1477 | lipopolysaccharide biosynthesis protein                                   | 2 | N |
| Tsac_1526 | hypothetical protein                                                      | 2 | N |
| Tsac_1529 | FAD-dependent pyridine nucleotide-disulfide oxidoreductase                | 2 | N |
| Tsac_1582 | multi-sensor signal transduction histidine kinase                         | 2 | N |
| Tsac_1584 | methyl-accepting chemotaxis sensory transducer                            | 2 | N |
| Tsac_1622 | integral membrane sensor signal transduction histidine kinase             | 2 | N |
| Tsac_1626 | hypothetical protein                                                      | 2 | N |
| Tsac_1636 | integral membrane sensor signal transduction histidine kinase             | 2 | N |
| Tsac_1683 | hypothetical protein                                                      | 2 | N |
| Tsac_1693 | 2-polyprenylphenol 6-hydroxylase                                          | 2 | N |
| Tsac_1721 | protein of unknown function DUF116                                        | 2 | N |
| Tsac_1730 | hypothetical protein                                                      | 2 | N |
| Tsac_1781 | flagellar M-ring protein FliF                                             | 2 | N |
| Tsac_1797 | flagellar biosynthetic protein FliQ                                       | 2 | N |
| Tsac_1844 | CDP-diacylglycerol/glycerol-3-phosphate 3-phosphatidyltransferase         | 2 | N |
| Tsac_1933 | stage III sporulation protein AF                                          | 2 | N |
| Tsac_1936 | stage III sporulation protein AC                                          | 2 | N |
| Tsac_1937 | stage III sporulation protein AB                                          | 2 | N |
| Tsac_2002 | Lipoprotein signal peptidase                                              | 2 | N |
| Tsac_2024 | protein of unknown function YGGT                                          | 2 | N |
| Tsac_2125 | hypothetical protein                                                      | 2 | N |
| Tsac_2146 | putative transmembrane anti-sigma factor                                  | 2 | N |
| Tsac_2149 | hypothetical protein                                                      | 2 | N |
| Tsac_2204 | protein of unknown function DUF445                                        | 2 | N |
| Tsac_2214 | hypothetical protein                                                      | 2 | N |
| Tsac_2263 | integral membrane sensor signal transduction histidine kinase             | 2 | N |
| Tsac_2354 | integral membrane sensor signal transduction histidine kinase             | 2 | N |
| Tsac_2384 | multi-sensor signal transduction histidine kinase                         | 2 | N |
| Tsac_2399 | protein of unknown function DUF1003                                       | 2 | N |
| Tsac_2416 | phage tail tape measure protein, TP901 family                             | 2 | N |
| Tsac_2479 | preprotein translocase, SecG subunit                                      | 2 | N |
| Tsac_2512 | hypothetical protein                                                      | 2 | N |
| Tsac_2567 | hypothetical protein                                                      | 2 | N |
| Tsac_2595 | hypothetical protein                                                      | 2 | N |
| Tsac_2612 | signal transduction histidine kinase regulating citrate/malate metabolism | 2 | N |
| Tsac_2635 | Cobalt transport protein cbiN                                             | 2 | N |
| Tsac_0085 | phosphoesterase PA-phosphatase related protein                            | 3 | N |
| Tsac_0098 | hypothetical protein                                                      | 3 | N |
| Tsac_0353 | hypothetical protein                                                      | 3 | N |
| Tsac_0400 | hypothetical protein                                                      | 3 | N |

|           |                                                               |   |   |
|-----------|---------------------------------------------------------------|---|---|
| Tsac_0518 | integral membrane sensor signal transduction histidine kinase | 3 | N |
| Tsac_0532 | MscS Mechanosensitive ion channel                             | 3 | N |
| Tsac_0533 | Colicin V production protein                                  | 3 | N |
| Tsac_0620 | pro-sigmaK processing inhibitor BofA                          | 3 | N |
| Tsac_0642 | protein of unknown function DUF1634                           | 3 | N |
| Tsac_0654 | hypothetical protein                                          | 3 | N |
| Tsac_0714 | hypothetical protein                                          | 3 | N |
| Tsac_0738 | integral membrane sensor signal transduction histidine kinase | 3 | N |
| Tsac_0785 | hypothetical protein                                          | 3 | N |
| Tsac_0790 | phosphoesterase PA-phosphatase related protein                | 3 | N |
| Tsac_0887 | Type II secretion system F domain-containing protein          | 3 | N |
| Tsac_0949 | GerA spore germination protein                                | 3 | N |
| Tsac_1133 | protein of unknown function DUF1294                           | 3 | N |
| Tsac_1152 | protein of unknown function DUF421                            | 3 | N |
| Tsac_1197 | glycosyl transferase family 2                                 | 3 | N |
| Tsac_1540 | hypothetical protein                                          | 3 | N |
| Tsac_1605 | pro-sigmaK processing inhibitor BofA                          | 3 | N |
| Tsac_1894 | hypothetical protein                                          | 3 | N |
| Tsac_1901 | stage V sporulation protein AC                                | 3 | N |
| Tsac_1952 | hypothetical protein                                          | 3 | N |
| Tsac_1956 | Type II secretion system F domain-containing protein          | 3 | N |
| Tsac_2262 | protein of unknown function DUF6 transmembrane                | 3 | N |
| Tsac_2281 | hypothetical protein                                          | 3 | N |
| Tsac_2463 | protein of unknown function DUF477                            | 3 | N |
| Tsac_2481 | hypothetical protein                                          | 3 | N |
| Tsac_2533 | hypothetical protein                                          | 3 | N |
| Tsac_2654 | polar amino acid ABC transporter, inner membrane subunit      | 3 | N |
| Tsac_0055 | protein of unknown function DUF988                            | 4 | N |
| Tsac_0125 | aminopeptidase-like protein                                   | 4 | N |
| Tsac_0141 | hypothetical protein                                          | 4 | N |
| Tsac_0192 | SNARE associated protein                                      | 4 | N |
| Tsac_0323 | protein of unknown function DUF1385                           | 4 | N |
| Tsac_0332 | protein of unknown function DUF214                            | 4 | N |
| Tsac_0352 | protein of unknown function DUF6 transmembrane                | 4 | N |
| Tsac_0355 | GtrA family protein                                           | 4 | N |
| Tsac_0409 | hypothetical protein                                          | 4 | N |
| Tsac_0449 | sporulation protein YtaF                                      | 4 | N |
| Tsac_0459 | branched-chain amino acid transport                           | 4 | N |
| Tsac_0514 | protein of unknown function DUF1212                           | 4 | N |
| Tsac_0515 | membrane spanning protein                                     | 4 | N |
| Tsac_0549 | membrane protein insertase, YidC/Oxa1 family                  | 4 | N |
| Tsac_0616 | CrcB-like protein                                             | 4 | N |
| Tsac_0617 | CrcB-like protein                                             | 4 | N |
| Tsac_0648 | cation diffusion facilitator family transporter               | 4 | N |
| Tsac_0651 | nucleoside recognition domain protein                         | 4 | N |
| Tsac_0657 | Abortive infection protein                                    | 4 | N |
| Tsac_0658 | hypothetical protein                                          | 4 | N |
| Tsac_0709 | hypothetical protein                                          | 4 | N |
| Tsac_0713 | hypothetical protein                                          | 4 | N |
| Tsac_0719 | hypothetical protein                                          | 4 | N |
| Tsac_0741 | hypothetical protein                                          | 4 | N |
| Tsac_0752 | GerA spore germination protein                                | 4 | N |
| Tsac_0826 | spore cortex biosynthesis protein YabQ                        | 4 | N |
| Tsac_0864 | hypothetical protein                                          | 4 | N |
| Tsac_0890 | protein of unknown function DUF6 transmembrane                | 4 | N |
| Tsac_0983 | PilT protein domain protein                                   | 4 | N |
| Tsac_1109 | hypothetical protein                                          | 4 | N |

|           |                                                                      |   |   |
|-----------|----------------------------------------------------------------------|---|---|
| Tsac_1171 | band 7 protein                                                       | 4 | N |
| Tsac_1198 | Glycerol-3-phosphate acyltransferase                                 | 4 | N |
| Tsac_1217 | integral membrane protein TIGR01906                                  | 4 | N |
| Tsac_1238 | protein of unknown function DUF214                                   | 4 | N |
| Tsac_1268 | hypothetical protein                                                 | 4 | N |
| Tsac_1291 | heavy metal translocating P-type ATPase                              | 4 | N |
| Tsac_1457 | ABC-type transporter, integral membrane subunit                      | 4 | N |
| Tsac_1506 | hypothetical protein                                                 | 4 | N |
| Tsac_1573 | protein of unknown function DUF1290                                  | 4 | N |
| Tsac_1625 | protein of unknown function UPF0016                                  | 4 | N |
| Tsac_1675 | protein of unknown function DUF81                                    | 4 | N |
| Tsac_1676 | protein of unknown function DUF81                                    | 4 | N |
| Tsac_1688 | hypothetical protein                                                 | 4 | N |
| Tsac_1722 | peptidase membrane zinc metallopeptidase                             | 4 | N |
| Tsac_1799 | flagellar biosynthetic protein FlhB                                  | 4 | N |
| Tsac_1819 | membrane-associated zinc metalloprotease                             | 4 | N |
| Tsac_1899 | stage V sporulation protein AE                                       | 4 | N |
| Tsac_1909 | stage II sporulation protein M                                       | 4 | N |
| Tsac_1924 | hypothetical protein                                                 | 4 | N |
| Tsac_1935 | stage III sporulation protein AD                                     | 4 | N |
| Tsac_1983 | hypothetical protein                                                 | 4 | N |
| Tsac_2032 | hypothetical protein                                                 | 4 | N |
| Tsac_2033 | hypothetical protein                                                 | 4 | N |
| Tsac_2069 | membrane protein of unknown function                                 | 4 | N |
| Tsac_2112 | peptidase M50                                                        | 4 | N |
| Tsac_2151 | phage shock protein C, PspC                                          | 4 | N |
| Tsac_2319 | protein of unknown function DUF6 transmembrane                       | 4 | N |
| Tsac_2370 | protein of unknown function DUF214                                   | 4 | N |
| Tsac_2381 | SNARE associated protein                                             | 4 | N |
| Tsac_2504 | PTS system mannose/fructose/sorbose family IID component             | 4 | N |
| Tsac_2598 | hypothetical protein                                                 | 4 | N |
| Tsac_2617 | MotA/TolQ/ExbB proton channel                                        | 4 | N |
| Tsac_2649 | hypothetical protein                                                 | 4 | N |
| Tsac_0051 | protein of unknown function DUF125 transmembrane                     | 5 | N |
| Tsac_0052 | hypothetical protein                                                 | 5 | N |
| Tsac_0062 | hypothetical protein                                                 | 5 | N |
| Tsac_0063 | Cobalamin biosynthesis protein cbiB                                  | 5 | N |
| Tsac_0100 | cation diffusion facilitator family transporter                      | 5 | N |
| Tsac_0124 | hypothetical protein                                                 | 5 | N |
| Tsac_0252 | cobalt ABC transporter, inner membrane subunit CbiQ                  | 5 | N |
| Tsac_0336 | ABC transporter related protein                                      | 5 | N |
| Tsac_0382 | ABC transporter related protein                                      | 5 | N |
| Tsac_0420 | protein of unknown function DUF606                                   | 5 | N |
| Tsac_0430 | VanZ family protein                                                  | 5 | N |
| Tsac_0473 | hypothetical protein                                                 | 5 | N |
| Tsac_0597 | exopolysaccharide biosynthesis polyprenyl glycosylphosphotransferase | 5 | N |
| Tsac_0650 | nucleoside recognition domain protein                                | 5 | N |
| Tsac_0701 | hypothetical protein                                                 | 5 | N |
| Tsac_0779 | putative signal transduction histidine kinase                        | 5 | N |
| Tsac_0791 | hypothetical protein                                                 | 5 | N |
| Tsac_0811 | SNARE associated protein                                             | 5 | N |
| Tsac_0885 | Type II secretion system F domain-containing protein                 | 5 | N |
| Tsac_0895 | peptidase A24A prepilin type IV                                      | 5 | N |
| Tsac_0946 | membrane protein-like protein                                        | 5 | N |
| Tsac_1044 | ABC-type transporter, integral membrane subunit                      | 5 | N |
| Tsac_1147 | Protein of unknown function DUF2179                                  | 5 | N |
| Tsac_1161 | NHL repeat containing protein                                        | 5 | N |

|           |                                                                 |   |   |
|-----------|-----------------------------------------------------------------|---|---|
| Tsac_1229 | hypothetical protein                                            | 5 | N |
| Tsac_1298 | protein of unknown function DUF624                              | 5 | N |
| Tsac_1380 | ABC-2 type transporter                                          | 5 | N |
| Tsac_1419 | ATP synthase subunit a                                          | 5 | N |
| Tsac_1441 | thiW protein                                                    | 5 | N |
| Tsac_1484 | hypothetical protein                                            | 5 | N |
| Tsac_1495 | BioY protein                                                    | 5 | N |
| Tsac_1530 | Heptaprenyl diphosphate synthase component I                    | 5 | N |
| Tsac_1576 | sigma-E processing peptidase SpoII GA                           | 5 | N |
| Tsac_1595 | Glycerol-3-phosphate acyltransferase                            | 5 | N |
| Tsac_1646 | ABC-type transporter, integral membrane subunit                 | 5 | N |
| Tsac_1798 | flagellar biosynthetic protein FlIR                             | 5 | N |
| Tsac_1842 | cell division FtsK/SpoIIIE                                      | 5 | N |
| Tsac_1897 | peptidase M50                                                   | 5 | N |
| Tsac_2075 | protein of unknown function DUF1393                             | 5 | N |
| Tsac_2120 | rod shape-determining protein MreD                              | 5 | N |
| Tsac_2142 | UPF0756 membrane protein yeaL                                   | 5 | N |
| Tsac_2225 | molybdate ABC transporter, inner membrane subunit               | 5 | N |
| Tsac_2250 | ABC transporter related protein                                 | 5 | N |
| Tsac_2364 | Protein of unknown function DUF2179                             | 5 | N |
| Tsac_2531 | hypothetical protein                                            | 5 | N |
| Tsac_2539 | protein of unknown function DUF988                              | 5 | N |
| Tsac_2548 | ABC transporter related protein                                 | 5 | N |
| Tsac_2555 | ABC-type transporter, integral membrane subunit                 | 5 | N |
| Tsac_2570 | ABC-type transporter, integral membrane subunit                 | 5 | N |
| Tsac_2624 | membrane protein-like protein                                   | 5 | N |
| Tsac_0149 | ABC-type transporter, integral membrane subunit                 | 6 | N |
| Tsac_0165 | ABC-type transporter, integral membrane subunit                 | 6 | N |
| Tsac_0166 | ABC-type transporter, integral membrane subunit                 | 6 | N |
| Tsac_0201 | ABC-type transporter, integral membrane subunit                 | 6 | N |
| Tsac_0242 | heavy metal translocating P-type ATPase                         | 6 | N |
| Tsac_0246 | ABC transporter permease                                        | 6 | N |
| Tsac_0337 | ABC transporter related protein                                 | 6 | N |
| Tsac_0340 | ABC-type transporter, integral membrane subunit                 | 6 | N |
| Tsac_0341 | ABC-type transporter, integral membrane subunit                 | 6 | N |
| Tsac_0383 | ABC transporter related protein                                 | 6 | N |
| Tsac_0495 | ABC-type transporter, integral membrane subunit                 | 6 | N |
| Tsac_0643 | protein of unknown function DUF81                               | 6 | N |
| Tsac_0694 | ABC-type transporter, integral membrane subunit                 | 6 | N |
| Tsac_0730 | Abortive infection protein                                      | 6 | N |
| Tsac_0761 | ABC-type transporter, integral membrane subunit                 | 6 | N |
| Tsac_0762 | ABC-type transporter, integral membrane subunit                 | 6 | N |
| Tsac_0777 | ABC-2 type transporter                                          | 6 | N |
| Tsac_0778 | ABC-2 type transporter                                          | 6 | N |
| Tsac_0788 | proton-coupled thiamine transporter YuaJ                        | 6 | N |
| Tsac_0801 | hypothetical protein                                            | 6 | N |
| Tsac_0911 | ABC-2 type transporter                                          | 6 | N |
| Tsac_0967 | diguanylate cyclase with GAF sensor                             | 6 | N |
| Tsac_1072 | 4Fe-4S ferredoxin iron-sulfur binding domain-containing protein | 6 | N |
| Tsac_1108 | hypothetical protein                                            | 6 | N |
| Tsac_1159 | ABC-type transporter, integral membrane subunit                 | 6 | N |
| Tsac_1163 | ABC-type transporter, integral membrane subunit                 | 6 | N |
| Tsac_1164 | ABC-type transporter, integral membrane subunit                 | 6 | N |
| Tsac_1203 | MIP family channel protein                                      | 6 | N |
| Tsac_1223 | ABC-2 type transporter                                          | 6 | N |
| Tsac_1272 | ABC-type transporter, integral membrane subunit                 | 6 | N |
| Tsac_1332 | hypothetical protein                                            | 6 | N |

|           |                                                                           |   |   |
|-----------|---------------------------------------------------------------------------|---|---|
| Tsac_1344 | ABC-type transporter, integral membrane subunit                           | 6 | N |
| Tsac_1345 | ABC-type transporter, integral membrane subunit                           | 6 | N |
| Tsac_1349 | ABC-type transporter, integral membrane subunit                           | 6 | N |
| Tsac_1350 | ABC-type transporter, integral membrane subunit                           | 6 | N |
| Tsac_1430 | ABC-type transporter, integral membrane subunit                           | 6 | N |
| Tsac_1445 | ABC-type transporter, integral membrane subunit                           | 6 | N |
| Tsac_1446 | ABC-type transporter, integral membrane subunit                           | 6 | N |
| Tsac_1458 | ABC-type transporter, integral membrane subunit                           | 6 | N |
| Tsac_1463 | ABC-type transporter, integral membrane subunit                           | 6 | N |
| Tsac_1464 | ABC-type transporter, integral membrane subunit                           | 6 | N |
| Tsac_1488 | phosphoesterase PA-phosphatase related protein                            | 6 | N |
| Tsac_1490 | CDP-alcohol phosphatidyltransferase                                       | 6 | N |
| Tsac_1510 | ABC-type transporter, integral membrane subunit                           | 6 | N |
| Tsac_1511 | ABC-type transporter, integral membrane subunit                           | 6 | N |
| Tsac_1514 | ABC-type transporter, integral membrane subunit                           | 6 | N |
| Tsac_1515 | ABC-type transporter, integral membrane subunit                           | 6 | N |
| Tsac_1585 | phosphate ABC transporter, inner membrane subunit PstC                    | 6 | N |
| Tsac_1586 | phosphate ABC transporter, inner membrane subunit PstA                    | 6 | N |
| Tsac_1632 | cytochrome c biogenesis protein transmembrane region                      | 6 | N |
| Tsac_1645 | ABC-type transporter, integral membrane subunit                           | 6 | N |
| Tsac_1664 | ABC-type transporter, integral membrane subunit                           | 6 | N |
| Tsac_1690 | protein-export membrane protein SecD                                      | 6 | N |
| Tsac_1691 | protein-export membrane protein SecF                                      | 6 | N |
| Tsac_2045 | diacylglycerol kinase                                                     | 6 | N |
| Tsac_2078 | ABC-2 type transporter                                                    | 6 | N |
| Tsac_2089 | ABC-type transporter, integral membrane subunit                           | 6 | N |
| Tsac_2244 | NifC-like ABC-type porter                                                 | 6 | N |
| Tsac_2256 | ABC-type transporter, integral membrane subunit                           | 6 | N |
| Tsac_2257 | ABC-type transporter, integral membrane subunit                           | 6 | N |
| Tsac_2265 | lantibiotic protection ABC transporter permease subunit, MutG family      | 6 | N |
| Tsac_2266 | lantibiotic protection ABC transporter permease subunit, MutE/EpiE family | 6 | N |
| Tsac_2271 | signal transduction histidine kinase, LytS                                | 6 | N |
| Tsac_2295 | ABC-type transporter, integral membrane subunit                           | 6 | N |
| Tsac_2302 | ABC-type transporter, integral membrane subunit                           | 6 | N |
| Tsac_2303 | ABC-type transporter, integral membrane subunit                           | 6 | N |
| Tsac_2323 | ABC-type transporter, integral membrane subunit                           | 6 | N |
| Tsac_2379 | sporulation protein YtaF                                                  | 6 | N |
| Tsac_2541 | YhgE/Pip N-terminal domain protein                                        | 6 | N |
| Tsac_2556 | ABC-type transporter, integral membrane subunit                           | 6 | N |
| Tsac_2608 | protein of unknown function DUF554                                        | 6 | N |
| Tsac_2628 | SNARE associated protein                                                  | 6 | N |
| Tsac_2634 | cobalt ABC transporter, inner membrane subunit CbiQ                       | 6 | N |
| Tsac_2636 | cobalamin biosynthesis protein CbiM                                       | 6 | N |
| Tsac_2650 | metal dependent phosphohydrolase                                          | 6 | N |
| Tsac_0058 | Cobalamin synthase                                                        | 7 | N |
| Tsac_0150 | ABC-type transporter, integral membrane subunit                           | 7 | N |
| Tsac_0202 | ABC-type transporter, integral membrane subunit                           | 7 | N |
| Tsac_0575 | sporulation integral membrane protein YtvI                                | 7 | N |
| Tsac_0580 | UPF0182 protein                                                           | 7 | N |
| Tsac_0676 | respiratory-chain NADH dehydrogenase subunit 1                            | 7 | N |
| Tsac_0693 | ABC-type transporter, integral membrane subunit                           | 7 | N |
| Tsac_0918 | UbiA prenyltransferase                                                    | 7 | N |
| Tsac_1123 | Protein of unknown function DUF318, transmembrane                         | 7 | N |
| Tsac_1158 | ABC-type transporter, integral membrane subunit                           | 7 | N |
| Tsac_1241 | PDZ/DHR/GLGF domain protein                                               | 7 | N |
| Tsac_1250 | ABC-type transporter, integral membrane subunit                           | 7 | N |

|           |                                                                      |   |   |
|-----------|----------------------------------------------------------------------|---|---|
| Tsac_1282 | ABC-type transporter, integral membrane subunit                      | 7 | N |
| Tsac_1589 | protein of unknown function DUF1614                                  | 7 | N |
| Tsac_1599 | peptidase M48 Ste24p                                                 | 7 | N |
| Tsac_1913 | hypothetical protein                                                 | 7 | N |
| Tsac_1954 | peptidase A24A domain protein                                        | 7 | N |
| Tsac_1987 | Abortive infection protein                                           | 7 | N |
| Tsac_2034 | hypothetical protein                                                 | 7 | N |
| Tsac_2047 | 7TM receptor with intracellular metal dependent phosphohydrolase     | 7 | N |
| Tsac_2079 | calcium-translocating P-type ATPase, PMCA-type                       | 7 | N |
| Tsac_2090 | ABC-type transporter, integral membrane subunit                      | 7 | N |
| Tsac_2154 | heavy metal translocating P-type ATPase                              | 7 | N |
| Tsac_2230 | ABC-type transporter, integral membrane subunit                      | 7 | N |
| Tsac_2294 | ABC-type transporter, integral membrane subunit                      | 7 | N |
| Tsac_2324 | ABC-type transporter, integral membrane subunit                      | 7 | N |
| Tsac_2350 | Conserved hypothetical protein CHP00245                              | 7 | N |
| Tsac_2386 | Potassium-transporting ATPase B chain                                | 7 | N |
| Tsac_2466 | Prolipoprotein diacylglycerol transferase                            | 7 | N |
| Tsac_2505 | phosphotransferase system PTS sorbose-specific IIC subunit           | 7 | N |
| Tsac_2547 | protein of unknown function DUF81                                    | 7 | N |
| Tsac_2603 | ABC-type transporter, integral membrane subunit                      | 7 | N |
| Tsac_0039 | ABC-type transporter, integral membrane subunit                      | 8 | N |
| Tsac_0089 | ABC-type transporter, integral membrane subunit                      | 8 | N |
| Tsac_0119 | phosphate transporter                                                | 8 | N |
| Tsac_0320 | zinc/iron permease                                                   | 8 | N |
| Tsac_0496 | ABC-type transporter, integral membrane subunit                      | 8 | N |
| Tsac_0526 | Protein of unknown function DUF2232, membrane                        | 8 | N |
| Tsac_0891 | hypothetical protein                                                 | 8 | N |
| Tsac_0919 | hypothetical protein                                                 | 8 | N |
| Tsac_0932 | stage II sporulation protein E, protein serine/threonine phosphatase | 8 | N |
| Tsac_1059 | transglutaminase domain-containing protein                           | 8 | N |
| Tsac_1071 | hypothetical protein                                                 | 8 | N |
| Tsac_1168 | glycosyltransferase 36                                               | 8 | N |
| Tsac_1170 | protein of unknown function DUF1648                                  | 8 | N |
| Tsac_1187 | Na <sup>+</sup> /Picotransporter                                     | 8 | N |
| Tsac_1280 | ABC-type transporter, integral membrane subunit                      | 8 | N |
| Tsac_1335 | copper-translocating P-type ATPase                                   | 8 | N |
| Tsac_1469 | protein of unknown function DUF214                                   | 8 | N |
| Tsac_1480 | ATPase, P-type (transporting), HAD superfamily, subfamily IC         | 8 | N |
| Tsac_1604 | Undecaprenyl-diphosphatase                                           | 8 | N |
| Tsac_1800 | flagellar biosynthesis protein FlhA                                  | 8 | N |
| Tsac_1817 | phosphatidate cytidyltransferase                                     | 8 | N |
| Tsac_1981 | protein of unknown function UPF0118                                  | 8 | N |
| Tsac_1986 | Abortive infection protein                                           | 8 | N |
| Tsac_1992 | Protein of unknown function DUF318, transmembrane                    | 8 | N |
| Tsac_2339 | ATPase, P-type (transporting), HAD superfamily, subfamily IC         | 8 | N |
| Tsac_2376 | YibE/F family protein                                                | 8 | N |
| Tsac_2600 | ABC-type transporter, integral membrane subunit                      | 8 | N |
| Tsac_0040 | ABC-type transporter, integral membrane subunit                      | 9 | N |
| Tsac_0067 | ABC-type transporter, integral membrane subunit                      | 9 | N |
| Tsac_0160 | MATE efflux family protein                                           | 9 | N |
| Tsac_0161 | Auxin Efflux Carrier                                                 | 9 | N |
| Tsac_0346 | PTS system, fructose subfamily, IIC subunit                          | 9 | N |
| Tsac_0971 | PTS system, fructose subfamily, IIC subunit                          | 9 | N |
| Tsac_1186 | spore germination protein                                            | 9 | N |
| Tsac_1192 | integral membrane protein                                            | 9 | N |
| Tsac_2229 | ABC-type transporter, integral membrane subunit                      | 9 | N |
| Tsac_2373 | rod shape-determining protein RodA                                   | 9 | N |

|           |                                                                     |    |   |
|-----------|---------------------------------------------------------------------|----|---|
| Tsac_2390 | hypothetical protein                                                | 9  | N |
| Tsac_2604 | ABC-type transporter, integral membrane subunit                     | 9  | N |
| Tsac_0032 | PTS system, N-acetylglucosamine-specific IIBC subunit               | 10 | N |
| Tsac_0048 | Auxin Efflux Carrier                                                | 10 | N |
| Tsac_0083 | ferrous iron transport protein B                                    | 10 | N |
| Tsac_0107 | phosphotransferase system EIIC                                      | 10 | N |
| Tsac_0134 | ABC-type transporter, integral membrane subunit                     | 10 | N |
| Tsac_0196 | sodium/calcium exchanger membrane region                            | 10 | N |
| Tsac_0351 | oligosaccharyl transferase STT3 subunit                             | 10 | N |
| Tsac_0364 | acyltransferase 3                                                   | 10 | N |
| Tsac_0455 | protein of unknown function DUF1646                                 | 10 | N |
| Tsac_0753 | spore germination protein                                           | 10 | N |
| Tsac_0782 | amino acid transporter-like protein                                 | 10 | N |
| Tsac_0813 | Manganese transport protein mntH                                    | 10 | N |
| Tsac_0948 | spore germination protein                                           | 10 | N |
| Tsac_1031 | preprotein translocase, SecY subunit                                | 10 | N |
| Tsac_1200 | arsenical-resistance protein                                        | 10 | N |
| Tsac_1267 | PTS system, cellobiose-specific IIC subunit                         | 10 | N |
| Tsac_1271 | ABC-type transporter, integral membrane subunit                     | 10 | N |
| Tsac_1313 | acyltransferase 3                                                   | 10 | N |
| Tsac_1323 | metal ion transporter, NRAMP family                                 | 10 | N |
| Tsac_1428 | protein of unknown function DUF6 transmembrane                      | 10 | N |
| Tsac_1478 | hypothetical protein                                                | 10 | N |
| Tsac_1566 | Phospho-N-acetylmuramoyl-pentapeptide-transferase                   | 10 | N |
| Tsac_1568 | stage V sporulation protein E                                       | 10 | N |
| Tsac_1984 | major facilitator superfamily MFS_1                                 | 10 | N |
| Tsac_2072 | DNA internalization-related competence protein ComEC/Rec2           | 10 | N |
| Tsac_2140 | Auxin Efflux Carrier                                                | 10 | N |
| Tsac_2164 | sodium ion-translocating decarboxylase, beta subunit                | 10 | N |
| Tsac_2286 | spore germination protein                                           | 10 | N |
| Tsac_2314 | PTS system, galactitol-specific IIC subunit                         | 10 | N |
| Tsac_2352 | major facilitator superfamily MFS_1                                 | 10 | N |
| Tsac_2385 | Potassium-transporting ATPase A chain                               | 10 | N |
| Tsac_2565 | PTS system, lactose/cellobiose family IIC subunit                   | 10 | N |
| Tsac_0254 | major facilitator superfamily MFS_1                                 | 11 | N |
| Tsac_0272 | ABC-type transporter, integral membrane subunit                     | 11 | N |
| Tsac_0314 | Glycosyl transferase, family 4, conserved region-containing protein | 11 | N |
| Tsac_0520 | natural resistance-associated macrophage protein                    | 11 | N |
| Tsac_0592 | O-antigen polymerase                                                | 11 | N |
| Tsac_0909 | uracil-xanthine permease                                            | 11 | N |
| Tsac_2614 | natural resistance-associated macrophage protein                    | 11 | N |
| Tsac_0114 | PTS system, lactose/cellobiose family IIC subunit                   | 12 | N |
| Tsac_0117 | amino acid permease-associated region                               | 12 | N |
| Tsac_0239 | MATE efflux family protein                                          | 12 | N |
| Tsac_0263 | putative sugar-specific permease SgaT/UlaA                          | 12 | N |
| Tsac_0309 | amino acid permease-associated region                               | 12 | N |
| Tsac_0357 | glycosyl transferase family 39                                      | 12 | N |
| Tsac_0358 | hypothetical protein                                                | 12 | N |
| Tsac_0663 | major facilitator superfamily MFS_1                                 | 12 | N |
| Tsac_0766 | amino acid permease-associated region                               | 12 | N |
| Tsac_0817 | major facilitator superfamily MFS_1                                 | 12 | N |
| Tsac_1246 | cell cycle protein                                                  | 12 | N |
| Tsac_1314 | amino acid permease-associated region                               | 12 | N |
| Tsac_1376 | major facilitator superfamily MFS_1                                 | 12 | N |
| Tsac_1607 | hypothetical protein                                                | 12 | N |
| Tsac_1640 | drug resistance transporter, EmrB/QacA subfamily                    | 12 | N |
| Tsac_2150 | amino acid permease-associated region                               | 12 | N |

|           |                                                                           |    |   |
|-----------|---------------------------------------------------------------------------|----|---|
| Tsac_2202 | major facilitator superfamily MFS_1                                       | 12 | N |
| Tsac_2247 | hydroxymethylpyrimidine transporter CytX                                  | 12 | N |
| Tsac_2261 | amino acid permease-associated region                                     | 12 | N |
| Tsac_2366 | major facilitator superfamily MFS_1                                       | 12 | N |
| Tsac_2572 | stage V sporulation protein B                                             | 12 | N |
| Tsac_0076 | amino acid permease-associated region                                     | 13 | N |
| Tsac_0769 | arginine/ornithine antiporter                                             | 13 | N |
| Tsac_2174 | amino acid permease-associated region                                     | 13 | N |
| Tsac_2396 | integral membrane protein MviN                                            | 13 | N |
| Tsac_2584 | Xanthine/uracil/vitamin C permease                                        | 13 | N |
| Tsac_0292 | integral membrane protein MviN                                            | 14 | N |
| Tsac_1483 | drug resistance transporter, EmrB/QacA subfamily                          | 14 | N |
| Tsac_1433 | O-antigen polymerase                                                      | 15 | N |
| Tsac_2269 | carbon starvation protein CstA                                            | 15 | N |
| Tsac_2336 | Pyrophosphate-energized proton pump                                       | 15 | N |
| Tsac_0675 | NADH/Ubiquinone/plastoquinone (complex I)                                 | 16 | N |
| Tsac_2176 | oligopeptide transporter, OPT family                                      | 16 | N |
| Tsac_0094 | hypothetical protein                                                      | 2  | Y |
| Tsac_0251 | hypothetical protein                                                      | 2  | Y |
| Tsac_0484 | signal transduction histidine kinase regulating citrate/malate metabolism | 2  | Y |
| Tsac_1590 | stage II sporulation protein P                                            | 2  | Y |
| Tsac_1629 | hypothetical protein                                                      | 2  | Y |
| Tsac_0245 | hypothetical protein                                                      | 6  | Y |
| Tsac_0250 | cobalamin (vitamin B12) biosynthesis CbiM protein                         | 6  | Y |
| Tsac_1796 | flagellar biosynthetic protein FliP                                       | 6  | Y |
| Tsac_1742 | sporulation integral membrane protein YlBJ                                | 8  | Y |
| Tsac_2115 | rod shape-determining protein RodA                                        | 8  | Y |
| Tsac_1144 | hypothetical protein                                                      | 9  | Y |
| Tsac_1934 | stage III sporulation protein AE                                          | 9  | Y |
| Tsac_0644 | hypothetical protein                                                      | 11 | Y |
| Tsac_2065 | hypothetical protein                                                      | 12 | Y |
| Tsac_2213 | ammonium transporter                                                      | 12 | Y |
| Tsac_2215 | ammonium transporter                                                      | 12 | Y |



**Supplemental Table S3.** ANOVA p-values for those proteins which are predicted to be secreted or localized to the membrane ranked from strongest to weakest conditional expression during growth on different substrates.

| Gene number and product                                                 | ANOVA       |
|-------------------------------------------------------------------------|-------------|
| Tsac_1459.Cellulose.14.beta.cellobiosidase.                             | 1.97E-14    |
| Tsac_1447.extracellular.solute.binding.protein.family.1.                | 2.35E-13    |
| Tsac_1462.extracellular.solute.binding.protein.family.1.                | 3.41E-12    |
| Tsac_1456.extracellular.solute.binding.protein.family.1.                | 9.72E-12    |
| Tsac_0136.periplasmic.sugar.binding.protein.                            | 4.06E-10    |
| Tsac_1513.extracellular.solute.binding.protein.family.1.                | 7.55E-10    |
| Tsac_0032.PTS.system.N.acetylglucosamine.specific.IIBC.subunit.         | 1.26E-09    |
| Tsac_1342.Pullulanase.                                                  | 1.95E-09    |
| Tsac_1461.extracellular.solute.binding.protein.family.1.                | 6.34E-09    |
| Tsac_1365.glucan.14.alpha.glucosidase.                                  | 1.49E-08    |
| Tsac_2177.pyruvate.ketoisovalerate.oxidoreductase.gamma.subunit.        | 5.54E-08    |
| Tsac_0897.Endo.14.beta.xylanase.                                        | 8.73E-08    |
| Tsac_0104.5..nucleotidase..2.3..cyclic.nucleotide.2..phosphodiesterase. | 9.24E-08    |
| Tsac_1346.Cyclomaltodextrin.glucanotransferase.                         | 1.82E-07    |
| Tsac_1348.extracellular.solute.binding.protein.family.1.                | 2.21E-07    |
| Tsac_0042.basic.membrane.lipoprotein.                                   | 5.02E-07    |
| Tsac_1347.chemotaxis.sensory.transducer.                                | 6.64E-07    |
| Tsac_1644.ABC.type.transporter.periplasmic.subunit.                     | 1.13E-06    |
| Tsac_1343.extracellular.solute.binding.protein.family.1.                | 1.34E-06    |
| Tsac_1279.EppA.BapA.family.protein.                                     | 1.84E-06    |
| Tsac_2304.extracellular.solute.binding.protein.family.1.                | 4.65E-06    |
| Tsac_0034.chemotaxis.sensory.transducer.                                | 7.37E-06    |
| Tsac_0692.extracellular.solute.binding.protein.family.1.                | 7.79E-06    |
| Tsac_0373.carboxyl.terminal.protease.                                   | 1.83E-05    |
| Tsac_0203.extracellular.solute.binding.protein.family.1.                | 3.44E-05    |
| Tsac_0151.extracellular.solute.binding.protein.family.1.                | 4.14E-05    |
| Tsac_1455.histidine.kinase.internal.region.                             | 0.00010067  |
| Tsac_1273.hypothetical.protein.                                         | 0.00016097  |
| Tsac_0937.ATP.dependent.metalloprotease.FtsH.                           | 0.000163591 |
| Tsac_1165.extracellular.solute.binding.protein.family.1.                | 0.000186136 |
| Tsac_0005.hypothetical.protein.                                         | 0.000247081 |
| Tsac_2541.YhgE.Pip.N.terminal.domain.protein.                           | 0.000255451 |
| Tsac_0167.extracellular.solute.binding.protein.family.1.                | 0.000310563 |
| Tsac_2153.Propeptide.PepSY.amd.peptidase.M4.                            | 0.000319521 |
| Tsac_0832.copper.amine.oxidase.like.domain.containing.protein.          | 0.000422497 |
| Tsac_0137.periplasmic.binding.protein.LacI.transcriptional.regulator.   | 0.000575378 |

|                                                                     |             |
|---------------------------------------------------------------------|-------------|
| Tsac_2395.thiamine.biosynthesis.Thi4.protein.                       | 0.000685224 |
| Tsac_1143.hypothetical.protein.                                     | 0.000977891 |
| Tsac_2336.Pyrophosphate.energized.proton.pump.                      | 0.001477411 |
| Tsac_2325.extracellular.solute.binding.protein.family.1.            | 0.001550176 |
| Tsac_0301.S.layer.domain.containing.protein.                        | 0.00167856  |
| Tsac_2504.PTS.system.mannose.fructose.sorbose.family.IID.component. | 0.001912198 |
| Tsac_0493.FAD.dependent.oxidoreductase.                             | 0.002086729 |
| Tsac_0913.secretion.protein.HlyD.family.protein.                    | 0.002619399 |
| Tsac_2571.lipoprotein.YaeC.family.                                  | 0.002974122 |
| Tsac_2601.ABC.transporter.substrate.binding.protein.                | 0.003653495 |
| Tsac_0017.hypothetical.protein.                                     | 0.004845978 |
| Tsac_0383.Xenobiotic.transporting.ATPase.                           | 0.00543876  |
| Tsac_2602.Extracellular.ligand.binding.receptor.                    | 0.005543996 |
| Tsac_2557.ABC.type.transporter.periplasmic.subunit.                 | 0.008087377 |

**Supplemental Table S4.** ANOVA p-values from the whole cell protein ranked from strongest to weakest conditional expression during growth on different substrates.

| Gene number and product                                                      | ANOVA    |
|------------------------------------------------------------------------------|----------|
| Tsac_2310.hypothetical.protein.                                              | 2.28E-18 |
| Tsac_1449.oxidoreductase.domain.protein.                                     | 9.22E-16 |
| Tsac_1459.Cellulose.14.beta.cellobiosidase.                                  | 1.97E-14 |
| Tsac_0499.Xylose.isomerase.domain.containing.protein.TIM.barrel.             | 7.57E-14 |
| Tsac_1447.extracellular.solute.binding.protein.family.1.                     | 2.35E-13 |
| Tsac_0276.xylulokinase.                                                      | 2.59E-12 |
| Tsac_1462.extracellular.solute.binding.protein.family.1.                     | 3.41E-12 |
| Tsac_1456.extracellular.solute.binding.protein.family.1.                     | 9.72E-12 |
| Tsac_0273.Monosaccharide.transporting.ATPase.                                | 1.02E-11 |
| Tsac_0194.hypothetical.protein.                                              | 4.08E-11 |
| Tsac_1906.anti.sigma.F.factor.antagonist.                                    | 4.23E-11 |
| Tsac_2313.ketose.bisphosphate.aldolase.                                      | 1.28E-10 |
| Tsac_2880.helix.turn.helix.domain.protein.                                   | 1.45E-10 |
| Tsac_1465.polysaccharide.deacetylase.                                        | 1.77E-10 |
| Tsac_2315.phosphotransferase.system.lactose.cellobiose.specific.IIB.subunit. | 1.82E-10 |
| Tsac_0695.glycosidase.related.protein.                                       | 2.05E-10 |
| Tsac_0136.periplasmic.sugar.binding.protein.                                 | 4.06E-10 |
| Tsac_1945.Shikimate.kinase.                                                  | 4.17E-10 |
| Tsac_1513.extracellular.solute.binding.protein.family.1.                     | 7.55E-10 |
| Tsac_1443.GntR.domain.protein.                                               | 7.76E-10 |
| Tsac_0608.hypothetical.protein.                                              | 1.11E-09 |
| Tsac_0032.PTS.system.N.acetylglucosamine.specific.IIBC.subunit.              | 1.26E-09 |
| Tsac_1702.Aspartate.carbamoyltransferase.                                    | 1.54E-09 |
| Tsac_1444.Mannonate.dehydratase.                                             | 1.70E-09 |
| Tsac_1342.Pullulanase.                                                       | 1.95E-09 |
| Tsac_2026.protein.of.unknown.function.UPF0001.                               | 2.24E-09 |
| Tsac_0628.formate.acetyltransferase.                                         | 2.24E-09 |
| Tsac_1703.dihydroorotase.multifunctional.complex.type.                       | 3.76E-09 |
| Tsac_0277.Xylose.isomerase.                                                  | 5.42E-09 |
| Tsac_1461.extracellular.solute.binding.protein.family.1.                     | 6.34E-09 |
| Tsac_1209.dihydroxyacetone.kinase.DhaK.subunit.                              | 9.97E-09 |
| Tsac_1452.Xylan.14.beta.xylosidase.                                          | 1.14E-08 |
| Tsac_1448.Alpha.glucuronidase.                                               | 1.29E-08 |
| Tsac_1365.glucan.14.alpha.glucosidase.                                       | 1.49E-08 |
| Tsac_0974.translation.elongation.factor.G.                                   | 1.56E-08 |
| Tsac_1389.ribosomal.protein.S4.                                              | 1.59E-08 |
| Tsac_2582.Phosphoribosylaminoimidazole.succinocarboxamide.synthase.          | 1.97E-08 |

|                                                                           |          |
|---------------------------------------------------------------------------|----------|
| Tsac_0193.glycogen.synthase.                                              | 2.93E-08 |
| Tsac_1210.dihydroxyacetone.kinase.L.subunit.                              | 2.94E-08 |
| Tsac_2177.pyruvate.ketoisovalerate.oxidoreductase.gamma.subunit.          | 5.54E-08 |
| Tsac_1230.Glycerol.3.phosphate.transporting.ATPase.                       | 6.56E-08 |
| Tsac_0897.Endo.14.beta.xylanase.                                          | 8.73E-08 |
| Tsac_0104.5..nucleotidase..2.3..cyclic.nucleotide.2..phosphodiesterase.   | 9.24E-08 |
| Tsac_0787.methylated.DNA.protein.cysteine.methyltransferase.              | 1.04E-07 |
| Tsac_2173.peptidase.M24.                                                  | 1.18E-07 |
| Tsac_0152.hypothetical.protein.                                           | 1.28E-07 |
| Tsac_0274.D.xylose.ABC.transporter.periplasmic.substrate.binding.protein. | 1.67E-07 |
| Tsac_1346.Cyclomaltodextrin.glucoamylase.                                 | 1.82E-07 |
| Tsac_1348.extracellular.solute.binding.protein.family.1.                  | 2.21E-07 |
| Tsac_1516.Kojibiose.phosphorylase.                                        | 2.29E-07 |
